# Supplementary material for: Selective colorimetric sensing of Co2+ and Cu2+ using 1-(2-pyridylazo)-2-naphthol derivative immobilized polyvinyl alcohol microspheres
Source: Royal Society of Chemistry journal article supplement (doi:10.1039/c5ra12765c), 2015-01-01
Supplement: c5ra12765c1.pdf [file c5ra12765c1.pdf]

Supplementary data

## Selective colorimetric sensing of $\text{Co}^{2+}$ and $\text{Cu}^{2+}$ using 1-(2-pyridylazo)-2-naphthol derivative immobilized polyvinyl alcohol microspheres

Xue Bai\*, Yulong Li, Haixin Gu, Zulin Hua

Key Laboratory of Integrated Regulation and Resource Development on Shallow Lake of Ministry of Education, College of Environment, Hohai University, Nanjing 210098, China

---

\*\* Corresponding author. Tel.: +86 15951940543.  
E-mail address: [baixue@hhu.edu.cn](mailto:baixue@hhu.edu.cn) (X. Bai).

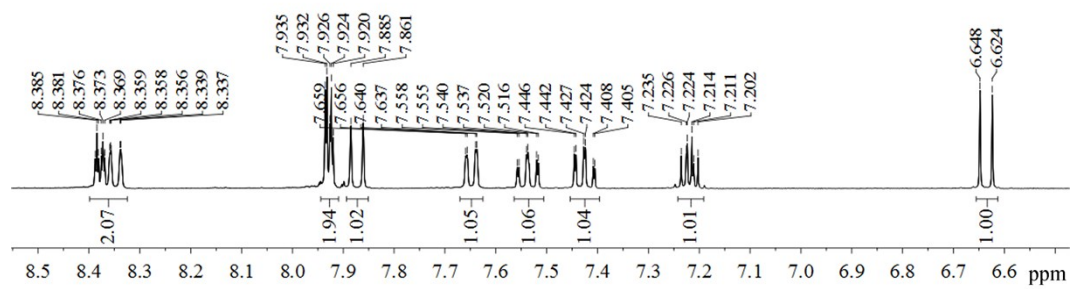

Fig. S1. <sup>1</sup>H NMR spectra of the receptor.

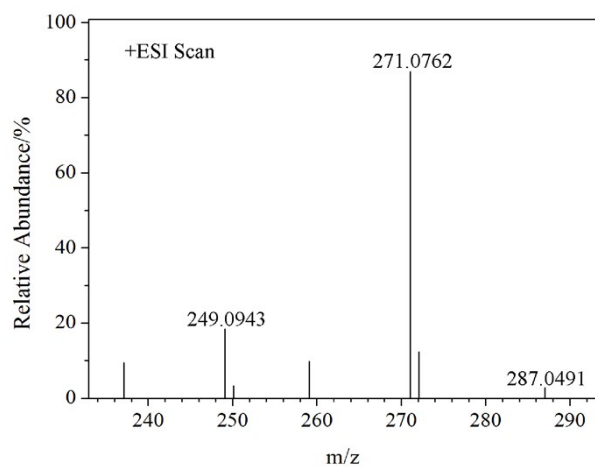

Fig. S2. HRMS spectra of the receptor.

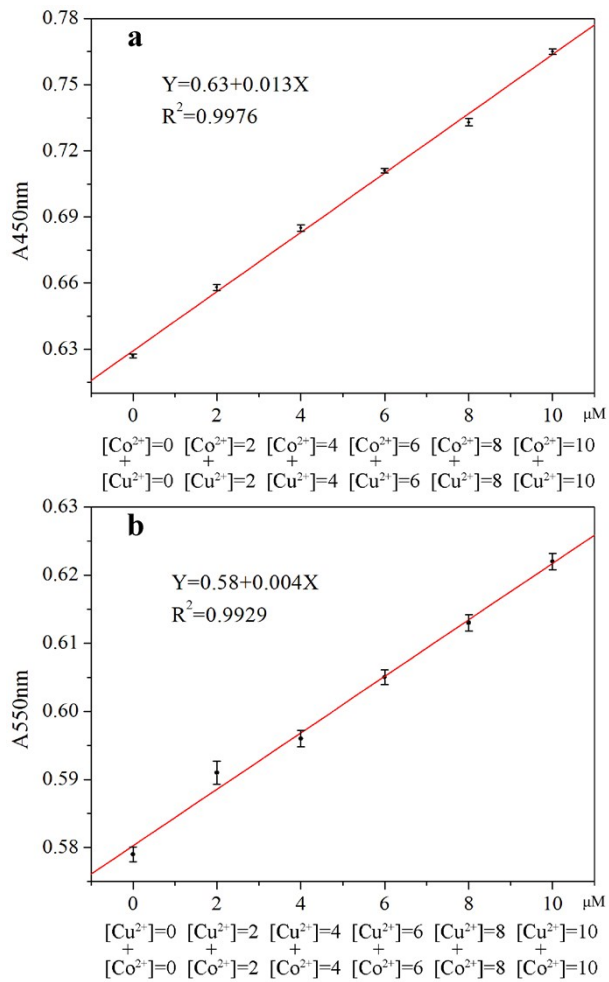

Fig. S3. Calibration graphs of interference of (a) Co<sup>2+</sup> and Cu<sup>2+</sup> ions.
